1 **Title:** N-dihydrogalactochitosan reduces mortality in a lethal mouse model of SARS-CoV-2

2

3 **Single Sentence Summary:** The immunoadjuvant N-dihydrogalactochitosan diminishes SARS-  
4 CoV-2 disease in humanized ACE2 mice representing a new countermeasure against COVID-  
5 19.

6

7 **Authors:** Christopher M. Weiss<sup>1,4</sup>, Hongwei Liu<sup>1</sup>, Erin E. Ball<sup>1</sup>, Samuel Lam<sup>2</sup>, Tomas Hode<sup>2</sup>, M.  
8 Kevin Keel<sup>1</sup>, Richard M. Levenson<sup>3</sup>, and Lark L. Coffey<sup>1\*</sup>

9

10 <sup>1</sup> Department of Pathology, Microbiology & Immunology, University of California, Davis, CA

11 <sup>2</sup> Immunophotonics, Inc., Saint Louis, MO

12 <sup>3</sup> Department of Pathology and Laboratory Medicine, UC Davis Health, Sacramento, CA

13 <sup>4</sup> Current address: Meissa Vaccines, Inc., Redwood City, CA

14

15 \*Corresponding Author

16 lcoffey@ucdavis.edu

17

18 ORCID iD:

19 Christopher Weiss 0000-0003-4704-9533

20 Hongwei Liu 0000-0002-8342-2545

21 Erin Ball 0000-0002-8464-6612

22 Richard Levenson 0000-0002-0112-6823

23 Lark Coffey 0000-0002-0718-5146

24 **ABSTRACT**

25 The rapid emergence and global dissemination of SARS-CoV-2 that causes COVID-19  
26 continues to cause an unprecedented global health burden resulting in more than 4 million  
27 deaths in the 20 months since the virus was discovered. While multiple vaccine  
28 countermeasures have been approved for emergency use, additional treatments are still  
29 needed due to sluggish vaccine rollout and vaccine hesitancy. Immunoadjuvant compounds  
30 delivered intranasally can guide non-specific innate immune responses during the critical early  
31 stages of viral replication, reducing morbidity and mortality. N-dihydrogalactochitosan (GC) is a  
32 novel mucoadhesive immunostimulatory polymer of  $\beta$ -0-4-linked N-acetylglucosamine that is  
33 solubilized by the conjugation of galactose glycans. We tested GC as a potential  
34 countermeasure for COVID-19. GC administered intranasally before and after SARS-CoV-2  
35 exposure diminished morbidity and mortality in humanized ACE2 receptor expressing mice by  
36 up to 75% and reduced infectious virus levels in the upper airway and lungs. Our findings  
37 demonstrate a new application for soluble immunoadjuvants like GC for preventing severe  
38 disease associated with SARS-CoV-2.

39

## 40 INTRODUCTION

41 Severe acute respiratory syndrome-like coronavirus 2 (SARS-CoV-2) that was first identified  
42 from a cluster of viral pneumonia cases in Wuhan, China in December 2019 (1) has caused  
43 more than 202 million cases and nearly 4.3 million deaths globally as of August 9, 2021. Clinical  
44 manifestations of 2019 novel coronavirus disease (COVID-19) caused by SARS-CoV-2 typically  
45 include fever, non-productive cough, and mild to moderate dyspnea, with severe cases  
46 developing pneumonia and acute respiratory distress syndrome (1–3). SARS-CoV-2 morbidity  
47 and mortality increase with age and systemic proinflammatory and cardiovascular co-morbidities  
48 (1, 2, 4). Recovered patients may also exhibit long-duration symptoms including disruption to  
49 sensations of taste and smell, and cognitive impairment (colloquially referred to as “brain fog”)  
50 resulting from neurological involvement (5, 6).

51 Like SARS-CoV, SARS-CoV-2 uses the angiotensin converting enzyme 2 (ACE2) for  
52 cell entry (7, 8). Small animals including mice, hamsters, and ferrets, have been fundamental in  
53 defining SARS-CoV-2 pathogenesis and developing medical countermeasures (9, 10).  
54 Transgenic mice expressing the human ACE2 (hACE2) gene from the human cytokeratin 18  
55 (K18) promoter have served as an especially useful model of severe disease due to well  
56 characterized genetics and ease of use (11–13). Intranasal inoculation of K18-hACE2 mice  
57 (hereafter termed hACE2) with SARS-CoV-2 results in a high viral burden in the lungs, which  
58 diminishes past day 7, and elevated viral loads detectable in the brain at day 7 (12).

59 SARS-CoV-2, which can be transmitted in small-droplet aerosols from person to person,  
60 can take up to 14 days to produce symptoms (14). Public health countermeasures have evolved  
61 as additional treatments and information regarding transmission risks for COVID-19 have  
62 become available. In addition to face coverings and physical distancing, multiple vaccine  
63 candidates have now received emergency use authorization by the United States Food and  
64 Drug Administration (FDA) (15). While ‘herd immunity’ through vaccination remains the target, it  
65 is estimated that 70-90% of the global population must be immune in order to interrupt

66 transmission (16). This target becomes even more challenging with high levels of vaccine  
67 skepticism, slow production, inequitable distribution, and the rise of variants of concern capable  
68 of more efficient transmission or vaccine escape. Pre- and post-exposure countermeasures can  
69 help fill the vaccine gap by reducing COVID-19 morbidity and mortality in unprotected  
70 communities and thus reduce the global burden of the pandemic. The nucleoside analog  
71 remdesivir (17) is the only current FDA-approved therapeutic and was authorized based on its  
72 ability to shorten recovery time in COVID-19 patients (18), but it is not ideal for clinical use due  
73 to its only moderate clinical efficacy (19), as well as its requirement for intravenous  
74 administration. As of October 2020, there were nearly 400 active trials of therapeutic agents  
75 with more than 10 drugs or biological products holding emergency use authorization, mostly  
76 indicated for patients with severe COVID-19 (20). Despite these advances, there are presently  
77 no drugs available for high-risk exposure use to protect against SARS-CoV-2. To circumvent  
78 this gap, we repurposed a therapy used for cancer and as a vaccine adjuvant with a goal of  
79 mitigating COVID-19 disease.

80         The parent compound of GC, chitosan, is a linear biological polysaccharide polymer of  
81  $\beta$ -0-4-linked N-acetylglucosamine and is produced from alkaline treatment of the chitin  
82 exoskeleton of crustaceans. Chitosan is approved by the FDA for tissue engineering and drug  
83 delivery. Chitosan shows broad acting antiviral (21) and immunoadjuvant properties (22, 23)  
84 including interferon (IFN) induction (24, 25) that is critical for viral control (26–28), and has been  
85 successfully tested as an antiviral therapy for respiratory viruses (29–31). Modification of  
86 chitosan by attaching galactose molecules to the free amino acids on the polysaccharide  
87 backbone produces N-dihydrogalactochitosan (GC) (32, 33). GC was initially designed to  
88 further improve immune stimulating function of the molecular backbone by adding glycan  
89 moieties, which can bind to C-type lectin receptors on antigen presenting cells (34) and lead to  
90 a downstream immune responses while retaining the mucoadhesive properties of the parent  
91 molecule (35). Furthermore, GC has improved solubility at physiological pH ranges compared to

92 its parent molecule, and hence is more suitable as an injectable agent. With these  
93 modifications, GC has been developed for use in human interventional immuno-oncology to  
94 stimulate systemic anti-tumor immunity (36). GC recruits granulocytes at the injection site (37)  
95 and stimulates activation of dendritic cells and macrophages through upregulation of co-  
96 stimulatory molecules CD40, CD86, and MHCII *in vitro* and *in vivo* (38, 39). Macrophages also  
97 show increased nitric oxide production and phagocytic abilities (38). Single-cell RNA  
98 sequencing indicates enrichment of type I IFN signaling in multiple innate immune cells,  
99 including monocytes, M1 macrophages, and neutrophils in tumors following GC administration  
100 (40). Broad-acting non-toxic immunoadjuvants like GC that upregulate innate immune  
101 responses and recruit cellular responses to the exposure site represent a novel approach  
102 against SARS-CoV-2. Furthermore, non-specific immunoadjuvants such as GC could offer a  
103 benefit over more narrowly targeted antivirals by providing protection against a range of  
104 pathogens, potentially including future agents not yet affecting public health.

105 In the present study, we explored the use of GC for prophylaxis against SARS-CoV-2  
106 infection applied pre- and post-exposure to lethal dosages of the virus in transgenic hACE2  
107 mice. To simulate the use of solubilized GC as a nasal spray, we applied the compound  
108 intranasally twice before exposure and once following exposure of mice to a human isolate of  
109 SARS-CoV-2. Our data demonstrate a strong protective effect from GC in preventing mortality  
110 in this lethal model of disease. Pre- and post-exposure countermeasures can help fill the  
111 vaccine gap by reducing COVID-19 morbidity and mortality in unprotected communities and  
112 reduce the global burden of the pandemic.

113

## 114 **RESULTS**

115 **N-dihydrogalactochitosan reduces SARS-CoV-2-associated mortality in hACE2**  
116 **transgenic mice.**

117 To determine the antiviral efficacy of N-dihydrogalactochitosan (GC) against SARS-  
118 CoV-2, 6-week-old hACE2 [B6.Cg-Tg(K18-ACE2)2PrImn/J] mice were treated intranasally (i.n.)  
119 with 0.75% of GC in neutral buffered saline 3 and 1 days prior to virus exposure and 1 day post  
120 exposure (**Fig. 1a**). Inhaled GC was well tolerated in mice, and no adverse events were noted  
121 during or after treatment. Mice were challenged i.n. 1 day prior to the final GC treatment with  $10^3$   
122 or  $10^4$  plaque forming units (PFU) of SARS-CoV-2, a route and dose intended to produce high  
123 lethality in this model. Inocula were back-titrated to verify the administered dose. Tracheal  
124 swabs were collected for the first 3 days post challenge and animals were monitored daily until  
125 day 14 for weight loss and health status.

126 Weight remained stable for the first 3 days in all groups and infected controls rapidly  
127 declined starting at day 4 in  $10^4$  PFU and day 5 in  $10^3$  PFU groups (**Fig. 1b**). Half of mice  
128 experienced no weight loss throughout the duration of the study (**Supplementary Fig. 1**);  
129 conversely, their growth outpaced mock-infected counterparts treated with saline alone  
130 ( $p < 0.0001$ ). This effect was not limited to one biological sex and did not correlate with mouse  
131 starting weight at the time of study initiation. Additional mice lost weight starting at day 4 but  
132 failed to reach euthanasia criteria (loss of 20% of initial body weight) and recovered to starting  
133 weight by day 14 post-challenge. Relative to the  $10^4$  group, mice challenged with  $10^3$  PFU  
134 SARS-CoV-2 exhibited delayed or transient weight loss, with 1 mouse experiencing no weight  
135 loss over the duration of the study. At the higher challenge dose of  $10^4$  PFU, GC significantly  
136 reduced weight loss versus delivery vehicle treated controls ( $p < 0.0001$ ). At the lower  $10^3$  PFU  
137 challenge dose, GC trended toward protection from weight loss, which was confounded by non-  
138 uniform disease in delivery vehicle treated controls ( $p = 0.11$ ). Mice treated with delivery vehicle  
139 and challenged with  $10^3$  or  $10^4$  PFU had a median survival time of  $7 \pm 3.3$  and  $6.5 \pm 0.9$  days,  
140 respectively (**Fig. 1c**). At the lower challenge dose of  $10^3$  PFU, GC had an efficacy of 37.5%  
141 protection from mortality ( $p = 0.05$ ) (**Fig. 1d**). At the higher challenge dose of  $10^4$  PFU, GC

142 reduced SARS-CoV-2 mortality by 75% ( $p < 0.0001$ ). Together, these results demonstrate the  
143 potent efficacy of GC in preventing fatal SARS-CoV-2 disease in transgenic mice.

144

#### 145 **N-dihydrogalactochitosan reduces SARS-CoV-2 viral levels in the upper respiratory tract.**

146 We next sought to determine whether GC reduced viral levels in addition to protecting mice from  
147 mortality. Infectious SARS-CoV-2 levels were assessed longitudinally in mice by swabbing  
148 throats from day 1 to 3 post-challenge (**Fig. 2a**). SARS-CoV-2 was detectible in the trachea of  
149 infected animals at day 1 post challenge and most animals had no detectible virus by day 3.  
150 Virus levels were elevated in mice inoculated with  $10^4$  PFU versus  $10^3$  PFU at 1 day post  
151 challenge ( $p = 0.05$ ), but differences between challenge doses were not detected after day 2  
152 ( $p > 0.99$ ). GC significantly reduced virus levels in the trachea at day 1 and day 2 post challenge  
153 with  $10^4$  PFU ( $p = 0.0005$  and  $p = 0.02$ , respectively). A similar effect was not observed in mice  
154 receiving the lower inoculum of  $10^3$  PFU. All delivery vehicle-treated mice had detectible virus in  
155 swabs following infection, while 29.2% (7/24) of mice had no infectious virus isolated between  
156 days 1 and 3. Positive virus detection in tracheal swabs was not correlated with lethal disease in  
157 mice ( $p = 0.62$ , Fisher's exact test). Cumulative virus levels in tracheal swabs were calculated as  
158 area under the curve for individual animals (**Fig. 2b**). GC significantly reduced the total virus  
159 levels in mice challenged with  $10^4$  PFU from a geometric mean of 225 to 5.6 PFU collected in  
160 swabs ( $p < 0.0001$ ) and trended toward a reduction in animals challenged with  $10^3$  PFU from 138  
161 to 15 PFU collected in swabs ( $p = 0.08$ ).

162 As individual animals met humane experimental endpoints, mice were euthanized  
163 between days 5 and 7. Infectious virus levels were measured in the lungs (**Fig. 2c**) and brain  
164 (**Fig. 2d**) at the time of death. The geometric mean lung viral titers ranged from 89 to 1209  
165 PFU/mg in delivery vehicle-treated control animals. Similarly, GC-treated mice had geometric  
166 mean lung titers ranging from 6 to 1004 PFU/mg. GC treatment trended toward a reduction in

167 lung virus levels ( $F=2.431$ ,  $p=0.06$ , two-way ANOVA) with cumulative effects in animals  
168 challenged with  $10^3$  PFU driving the main treatment effect ( $p=0.06$ ).

169         Comparatively high viral titers were observed in the brain at the time of death, consistent  
170 with previous descriptions in this model (12). Virus was detectable in the brain in all but 2  
171 infected animals at the time of death, indicating neuroinvasion as a likely cause of morbidity.  
172 Delivery vehicle-treated control animals had geometric mean brain titers ranging from 13,695 to  
173 21,4045 PFU/mg. Geometric mean brain titers in GC-treated animals ranged from 1,351 to  
174 24,299 PFU/mg. No significant trends in brain virus levels were observed between treatments  
175 ( $F=0.8134$ ,  $p=0.52$ , two-way ANOVA). No infectious virus was detectable in the lungs or brains  
176 of animals euthanized at day 14 post challenge.

177 **N-dihydrogalactochitosan reduces the severity of histopathologic lesions associated**  
178 **with SARS-CoV-2 infection in lungs.**

179         Intranasal inoculation of hACE2 transgenic mice with PBS followed by mock inoculation  
180 resulted in normal lung architecture in most mice, although several animals exhibited mild  
181 alveolar septal inflammation, likely associated with i.n. administration (**Fig. 3a**). By contrast,  
182 mice inoculated with  $10^3$  or  $10^4$  PFU SARS-CoV-2 (**Fig. 3c**, representative  $10^3$  image shown)  
183 exhibited extensive lymphohistiocytic interstitial pneumonia with a peribronchiolar and  
184 perivascular distribution and scattered multinucleated syncytial cells. Bronchiolitis, bronchiolar  
185 epithelial and alveolar septal necrosis, hemorrhage, fibrin, edema, and vascular endothelial  
186 inflammation were also occasionally noted. SARS-CoV-2-infected mice treated with GC showed  
187 lesser histopathologic lesions in the lung (**Fig. 3b**) compared to animals that did not receive GC,  
188 and inflammation was focally distributed instead of widespread. To quantify histopathologic  
189 changes, lung lesion severity (**Fig. 3d**) was scored using specific criteria (**Supplementary**  
190 **Table 1**) and the total area of the lung that was affected was estimated using image analysis  
191 software (**Fig. 3e**). GC treatment significantly reduced the mean severity score for animals  
192 dosed with  $10^4$  PFU SARS-CoV-2 from 4.6 to 2.5 (ANOVA,  $p < 0.0001$ ). Mean scores for mice



193 treated with GC and  $10^3$  PFU of SARS-CoV-2 trended towards being lower than for mice who  
194 did not receive GC but were not significantly different ( $p > 0.05$ ). The percent of lung affected in  
195 mice that received the  $10^4$  SARS-CoV-2 dose was also significantly reduced from a mean of  
196 33% to 13% ( $p < 0.0001$ ); differences at the  $10^3$  dose were not significant.

197 A subset of GC-treated and untreated mice exhibited mild rhinitis, characterized by  
198 mucus, sloughed cells, necrotic debris, and scattered neutrophils in the nasal cavity. One GC-  
199 treated mouse (**Supplementary Fig. 2a**) and 3 mock-inoculated mice exhibited pulmonary  
200 foreign-material reactions, with necrosuppurative bronchiolitis and multiple foci of neutrophils,  
201 macrophages, and multinucleated giant cells surrounding intracellular and extracellular brightly  
202 eosinophilic foreign material. Consistent with high viral titers in the brain, some GC-treated and  
203 untreated mice exhibited mild to moderate lymphocytic meningitis with perivascular cuffing and  
204 occasional extension of lymphocytes into the adjacent neuropil (**Supplementary Fig. 2b,c**).  
205 Together, these data show that GC reduces SARS-CoV-2-induced disease in the lung of  
206 hACE2 mice, although only significantly in mice administered the higher  $10^4$  PFU dose of  
207 SARS-CoV-2. The pulmonary foreign material reactions and alveolar inflammation in both GC-  
208 and mock-treated mice may stem from the volume or frequency of i.n. treatment; future studies  
209 using GC could modify both parameters as a means to reduce these lesions.

#### 210 **Mice treated with N-dihydrogalactochitosan produce neutralizing antibodies after SARS-** 211 **CoV-2 exposure.**

212 Finally, we sought to determine whether mice surviving SARS-CoV-2 challenge  
213 produced a humoral immune response that might protect them from future challenge. Serum  
214 from blood collected at day 14 post inoculation was assessed for neutralizing antibody against  
215 the challenge strain of SARS-CoV-2 by plaque reduction neutralization test (PRNT) at the 80%  
216 neutralization threshold (**Fig. 4**). All infected mice surviving viral challenge generated  
217 neutralizing antibodies. Mice in the GC group challenged with  $10^3$  or  $10^4$  PFU generated  
218 geometric mean neutralizing titers of 1:676 and 1:861, respectively. In comparison, PBS-

219 administered mice that received a challenge dose of  $10^3$  PFU had a mean neutralizing titer of  
220 1:1448. Neutralizing antibody titers were not different across treatments ( $p > 0.9999$ ) or virus  
221 dose, although PBS-administered mice challenged with  $10^4$  PFU SARS-CoV-2 were unavailable  
222 for comparison due to uniform lethality. These data confirm that surviving mice were  
223 productively infected and indicate that animals were able to develop adaptive immune  
224 responses that could potentially protect against reinfection.

225

## 226 **DISCUSSION**

227 Intranasal administration of GC to prevent or treat SARS-CoV-2 represents a novel  
228 application of this potent immunostimulatory compound. In the present study, GC was well-  
229 tolerated and prevented lethal disease in up to 75% of treated humanized mice, while all mice  
230 not receiving GC but challenged with the  $10^4$  PFU SARS-CoV-2 had to be euthanized. All  
231 surviving animals had neutralizing antibodies detectable at 14 days post inoculation. Similar  
232 SARS-CoV-2 antibody titers were detected in GC-treated and untreated animals. Mice that  
233 received GC treatment also displayed lower levels of infectious SARS-CoV-2 in tracheal swabs  
234 collected 1 to 2 days post inoculation and had less severe lesions in lungs. Reducing virus  
235 levels in the upper airway has gained particular significance as recent vaccine breakthrough  
236 cases with variants of concern demonstrate SARS-CoV-2 shedding at similar levels to  
237 unvaccinated individuals, which is a key determinant of transmission potential (41). Our findings  
238 demonstrate a reduction in viral burden and virus-induced disease along with a resultant  
239 increase in survival due to GC treatment.

240 GC is a polymeric mixture containing strands of varying lengths of selectively galactose-  
241 conjugated and partially deacetylated  $\beta$ -0-4-linked N-acetylglucosamine molecules with a  
242 specific range of molecular weights (32, 33, 36, 37). Synthesized and purified under Good  
243 Manufacturing Practice (GMP) conditions, N-dihydrogalactochitosan is a well-characterized  
244 variant of GC. Characterization and quality control testing ruled out contamination from

245 endotoxins, heavy metals, and other impurities, which eliminates a major confounding factor in  
246 the research of these naturally derived molecules, and chitosan in particular (42). Water  
247 solubility, immunological properties, biocompatibility, and a favorable toxicity profile are key  
248 features of GC. The unconjugated base polymer, chitin, is a primary structural component of cell  
249 walls for organisms ranging from fungi to arthropods (21). Chitosan, a derivative of chitin, is  
250 deacetylated through alkaline treatment and is marketed as a nutritional supplement (43) and  
251 used as a biopolymer (44). Unmodified chitosan has been used successfully to treat influenza A  
252 virus infection in mice (29), demonstrating a potential application as a non-specific antiviral  
253 compound for respiratory virus infection. However, unmodified chitosan has low solubility in  
254 neutral buffered aqueous solution and requires acidic formulation; poor characterization,  
255 purification and lack of controlled synthetic process leads to poor reproducibility and  
256 unpredictable outcomes (42). GC circumvents these limitations through a controlled and  
257 reproducible process of synthetically attaching galactose to the free-amino groups of the  
258 chitosan base, improving solubility (and thus bioavailability) while maintaining a physiological  
259 pH. GC has been previously used as a combination anti-tumor therapy due to its  
260 immunoadjuvant properties (38, 40), but its utility as a broad-acting antiviral compound has not  
261 previously been investigated.

262           Immuno-adjuvants stimulate non-specific innate immune responses through various  
263 mechanisms. Some use pattern-recognition receptors, including the Toll-like receptor (TLR)  
264 family of antigen detection complexes. While the mechanism of SARS-CoV-2 protection has not  
265 been determined for GC, chitosan, and similar polymers of N-acetylglucosamine, interact with  
266 TLR2, which serves as a rationale for inclusion of chitosan as a vaccine adjuvant. TLR2 signals  
267 through myeloid differentiation factor 88 (MyD88) to stimulate the nuclear factor kappa B (NF-  
268  $\kappa$ B) pathway and downstream inflammatory and anti-microbial cytokine responses (45, 46). TLR  
269 engagement of the canonical NF- $\kappa$ B pathway up-regulates both tumor necrosis factor alpha  
270 (TNF- $\alpha$ ) and interleukin-6 (IL-6), two potent pro-inflammatory effectors. IL-6, which is necessary

271 for antiviral immunity against other virus families, has been identified as a target of  
272 dysregulation associated with hyperinflammatory responses in the lungs during SARS-family  
273 coronavirus infections. SARS-CoV-1 nucleocapsid protein can stimulate NF- $\kappa$ B activation and  
274 IL-6 production independent of infection (47). Prolonged high levels of IL-6 are correlated with  
275 severe COVID-19 outcomes in humans, and a similar association has been found in ferrets  
276 infected with SARS-CoV-2 (48). The timing of IL-6 production may play a critical role in  
277 determining whether viral clearance is achieved or alternatively, hyperinflammatory responses  
278 result. Early, but not late, induction of IL-6 during respiratory syncytial virus (RSV), influenza A,  
279 and rhinovirus infection promote viral clearance and limit prolonged inflammation by establishing  
280 regulatory T cell populations that limit virus spread (49). Similarly, timed induction of pro-  
281 inflammatory responses by GC treatment pre- and post-infection may promote viral clearance  
282 before virus-mediated dysregulation of this pathway can occur. As such, future studies should  
283 explore the timing of GC treatment and regulation of IL-6 and associated pro-inflammatory  
284 pathways.

285         The data in this study demonstrate that treatment with GC induces robust neutralizing  
286 antibody responses by day 14, after a reduction in infectious SARS-CoV-2 in tracheal swabs by  
287 day 3. These data suggest GC functions as an immunoadjuvant that can modulate innate  
288 immune responses after SARS-CoV-2 infection, leading to stimulation of robust antiviral  
289 adaptive immunity. Experimental evidence from cell culture and animal models support at least  
290 three mechanisms by which complex carbohydrates such as GC could stimulate the innate and  
291 adaptive immune systems (50–53). First, GC recognition by sensors on macrophages and  
292 dendritic cells (DC) can stimulate innate immune defenses (54–56). While immune receptors for  
293 GC have not been identified, chitosan binding to C-type lectin receptors such as dectin-1 can  
294 initiate innate immune signaling (57, 58). Second, GC-mediated antigen uptake (59) and antigen  
295 presentation by DCs could lead to CD4 and CD8 T cell responses (37, 38). Studies in mice  
296 show GC induces type 1 IFN (40), leading to enhanced DC activation and robust CD4 T helper

297 cells (51). Notably, DNA sensor activation is mediated via cellular DNA release by chitosan.  
298 Third, physical antigen sequestration and slow antigen release within draining lymph nodes  
299 facilitated by GC could potentially prolong germinal center reactions, thereby enhancing  
300 humoral immunity by fostering affinity maturation of B cells (60, 61). Thus, GC may have  
301 potential as a dual-purpose preventative and therapeutic with immunostimulatory properties.  
302 Future studies are needed to investigate the impact of GC on SARS-CoV-2-specific immune  
303 responses.

304 In addition to the immunoadjuvant properties of GC, direct interactions between GC and  
305 SARS-CoV-2 in the nasal cavity may contribute to the protection we observed in mice. As the  
306 nasopharyngeal and oral cavity are often the primary entry sites of SARS-CoV-2 and other  
307 respiratory viruses, interventions or medications at these locations could provide an important  
308 boost in the first line of defense. The reduction in SARS-CoV-2 levels in GC treated mice in the  
309 first 2 days post-challenge suggests that GC has early effects that hamper the initial phase of  
310 viral infection, especially given that serum neutralizing antibodies are not detectable before  
311 about 7 days. In addition to possible innate immune stimulation, aqueous GC is viscous and  
312 may remain in the airway after intranasal administration. GC present at the time of infection may  
313 act as a physical barrier or directly inactivate SARS-CoV-2 before it can initiate infection.  
314 Additional studies of GC bioavailability and detailed studies of GC-virus interactions including to  
315 establish whether GC blocks virus entry and/or replication are needed to establish mechanisms  
316 of protection; these experiments could also clarify why greater protection from lethal disease  
317 was observed after challenge with the higher SARS-CoV-2 dose in these studies.

318 In summary, we show here that GC treatment of humanized mice pre- and post-infection  
319 with SARS-CoV-2 reduces lethal disease, virus levels in the upper respiratory tract, and  
320 significant lesions in the lungs. These data suggest a possible role of GC as a SARS-CoV-2  
321 countermeasure. Additional pre-clinical studies could focus on the mechanism of protection,  
322 including further assessment of the antiviral and immunomodulatory effects of GC. Future

323 studies should also identify the GC dose and schedule that confer the greatest benefit in  
324 reducing disease while minimizing foreign-material reactions as detected in the lungs of several  
325 of the mice in this study, as well as to determine whether GC shows both prophylactic and  
326 therapeutic benefits.

327

## 328 **METHODS**

329 **Ethics Statement:** All mouse work was conducted on protocol #21868 approved by the  
330 institutional animal care and use committee (IACUC) at the University of California, Davis.  
331 Infectious virus was handled in certified animal biosafety level 3 laboratory (ABSL-3) spaces in  
332 compliance with approved institutional biological use authorization #R2813. The University of  
333 California, Davis, is accredited by the Association for Assessment and Accreditation of  
334 Laboratory Animal Care (AAALAC). All mouse work adhered to the NIH Guide for the Care and  
335 Use of laboratory Animals.

336 **Mice:** Equal numbers of male and female transgenic mice expressing the human ACE2  
337 receptor on a K18 transgene in a C57Bl/6J background (B6.Cg-Tg(K18-ACE2)2PrImn/J,  
338 referenced as 'hACE2') were purchased at 5 weeks of age from Jackson Laboratories  
339 (Sacramento, CA). Mice were co-housed by sex in ABSL-3 conditions with 4 animals per cage  
340 and acclimated for up to 6 days at 22-25°C and a 12:12 hour light: dark cycle. Rodent chow with  
341 18% protein content and sterile bottled water was provided *ad libitum* for the duration of the  
342 experiment.

343 **Virus:** SARS-CoV-2/human/USA/CA-CZB-59X002/2020 (GenBank #MT394528), which was  
344 isolated from a patient in 2020 in Northern California and passaged once in Vero-E6 cells, was  
345 generously provided by Dr. Christopher Miller (University of California, Davis). To generate  
346 stocks for these studies, SARS-CoV-2 was passaged one additional time in Vero-E6 cells to  
347 achieve a titer of  $2.2 \times 10^7$  plaque forming units (PFU)/mL. Single-use virus aliquots were stored  
348 at -80°C.

349 ***N-dihydrogalactochitosan Treatment and SARS-CoV-2 Challenge:*** Sterile 1%  
350 weight/volume N-dihydrogalactochitosan (GC) was provided by Immunophotonics. GC was  
351 generated using Good Manufacturing Practices (GMP). Testing of GC included appearance,  
352 identity (1H NMR and UV/Vis), assay (HPLC), degree of galactation (1H NMR), viscosity,  
353 specific gravity, pH, microbiological (endotoxins and sterility), subvisible particulate matter,  
354 impurities (boron, galactose, galactitol, transition metals), molecular weight, and polydispersity  
355 indices. GC was presented as a 1.0% sterile solution (10 mg/ml) in 5 ml sealed vials and was  
356 diluted with sterile deionized water and sterile filtered 20X phosphate buffered saline (PBS) to a  
357 final concentration of 0.75% GC and 1X PBS. Mice were anesthetized with isoflurane and 40  $\mu$ L  
358 of either diluted GC or PBS delivery vehicle was administered intranasally (i.n.) by a hanging  
359 drop over both nares. Mice were treated identically at 3 days and 1 day prior to challenge and 1  
360 day post challenge. At challenge, mice were anesthetized and administered 30  $\mu$ L of PBS or  
361 SARS-CoV-2 diluted in PBS at a dose of  $10^3$  or  $10^4$  PFU i.n. via hanging drop. Inocula were  
362 back-titrated to confirm the target dose. Mice were monitored twice daily for changes in weight,  
363 ruffled fur, ataxia, and labored breathing for up to 14 days. On days 1, 2 and 3, mice were  
364 anesthetized with isoflurane and throats were swabbed with rayon-tipped swabs (Puritan, Fisher  
365 Scientific, Fisher Scientific, Waltham, MA). Swabs were vortexed briefly in 400  $\mu$ L of Dulbecco's  
366 Modified Eagles Medium (DMEM, Fisher Scientific, Waltham, MA) and frozen at  $-80^{\circ}\text{C}$ . Mice  
367 were euthanized prior to experimental endpoint if weight loss exceeded 20% of the starting  
368 weight or if animals were deemed moribund as evidenced by limb weakness, ataxia or dragging  
369 of limbs, loss of limb function or rapid or depressed respiration rate. An adverse event was  
370 defined as any moribund disease signs at any time over the duration of the experiment. Prior to  
371 euthanasia, whole blood was collected by submandibular vein puncture under isoflurane  
372 anesthesia. Whole blood was clotted for  $>10$  min at room temperature then centrifuged for 5  
373 minutes at 8,000 x g and cleared serum was stored at  $-80^{\circ}\text{C}$ . Mice were euthanized by  
374 isoflurane overdose and cervical dislocation then perfused with cold sterile PBS. Lung (right

375 inferior lobe) and brain (left hemisphere) were weighed and homogenized in 1-10  $\mu$ L/mg DMEM  
376 with a sterile glass bead at 30 Hz for 4 minutes using a TissueLyser (Qiagen, Germantown, MD)  
377 automated homogenizer. Homogenates were cleared by centrifugation at 10,000 x g for 4  
378 minutes and the cleared fraction was stored at -80°C.

379 **Histopathology:** At necropsy, lungs were inflated with 10% buffered formalin (Fisher Scientific,  
380 Waltham, MA) and mice were fixed for 48 hours at room temperature in a 10-fold volume of  
381 10% buffered formalin. Skulls were demineralized in a 10-fold volume of 0.5 M ethylenediamine  
382 tetraacetic acid (EDTA) (pH=7) at 4°C for 14 days, with EDTA solution exchanges every 3 days.  
383 Tissues were embedded in paraffin, thin-sectioned, and stained with hematoxylin and eosin  
384 (H&E). H&E-stained slides were scanned by a whole-slide image technique using an Aperio  
385 slide scanner (Leica, Buffalo Grove, IL) with a resolution of 0.24  $\mu$ m/pixel. Image files were  
386 uploaded on a Leica hosted web-based site and a board certified veterinary anatomic  
387 pathologist without knowledge of treatment conditions evaluated sections for SARS-CoV-2  
388 induced histologic lesions. For quantitative assessment of lung inflammation, digital images  
389 were captured and analyzed using ImageJ software (Fiji, NIH) to estimate the area of inflamed  
390 tissue that was visible to the naked eye at subgross magnification as a percentage of the total  
391 surface area of the lung section. Each lung section was scored as described (**Supplementary**  
392 **Table 1**).

393 **Plaque Assay:** Washes from tracheal swabs, serum, residual inocula, and lung and brain  
394 homogenates were thawed and assayed. Samples were serially diluted 10-fold in DMEM with  
395 1% bovine serum albumen (BSA) starting at an initial dilution of 1:8. 125  $\mu$ L of each dilution was  
396 added to confluent Vero CCL-81 cells (ATCC, Manassas, VA) in 12-well plates with cell culture  
397 media decanted. Virus was incubated on cells for 1 hour at 5% CO<sub>2</sub> in a humidified 37°C  
398 incubator. Cell monolayers were overlaid with 0.5% agarose dissolved in DMEM with 5% fetal  
399 bovine serum (FBS) and 1x antibiotic-antimycotic (Fisher Scientific, Waltham, MA) and  
400 incubated for 3 days at 5% CO<sub>2</sub> and 37°C in a humidified incubator. Cells were fixed for >30



401 minutes with 4% formaldehyde then agarose plugs were removed. Cells were stained with  
402 0.05% crystal violet in 20% ethanol for 10 minutes then rinsed three times with water. Plates  
403 were inverted to dry completely and the number of plaques in each well was counted. Viral titers  
404 were recorded as the reciprocal of the highest dilution where plaques were noted and are  
405 represented as PFU per swab or PFU per mg of solid tissue.

406 **Plaque Reduction Neutralization Test:** Serum collected from mice at day 14 post inoculation  
407 was thawed at 37°C and 30 µL was heated in a water bath for 30 minutes at 56°C to inactivate  
408 complement proteins. Serum was diluted 4-fold with virus diluent consisting of PBS and 1%  
409 FBS, then samples were serially 2-fold diluted 11 times for a dynamic range of 1:4 to 1:4096. An  
410 equal volume of virus diluent containing 80 PFU of SARS-CoV-2 was added to each antibody  
411 dilution and a no-antibody control consisting of virus diluent only, resulting in a final dynamic  
412 range of 1:4 to 1:8192 with one no-antibody control. Antibody-virus dilution series were  
413 incubated for 1 hour at 37°C after which they were applied to confluent Vero CCL-81 cells in  
414 single-replicate and incubated for 1 hour at 5% CO<sub>2</sub> and 37°C in a humidified incubator. Cells  
415 were overlaid, incubated, fixed, and stained as described above for plaque assays. Neutralizing  
416 titer is defined as the reciprocal of the dilution for which fewer than 20% of plaques were  
417 detected versus the no-antibody control (>80% neutralization).

418 **Statistics:** All statistical tests were performed with GraphPad PRISM 9.0.2 (GraphPad  
419 Software). Logrank (Mantel-Cox) test for survival proportions were performed pairwise and *p*-  
420 values were adjusted with Bonferroni correction using R version 4.0.0 (R Project) *p.adjust*  
421 function. The correlation between mortality and positive virus detection was calculated by  
422 Fisher's exact test. Repeated measures two-way ANOVA tests were performed on log<sub>10</sub>-  
423 transformed viral titers and multiple comparisons were computed according to Tukey method.  
424 Main effect two-way ANOVA tests were performed on mouse weights normalized to starting  
425 values at the time of virus challenge or log<sub>10</sub>-transformed viral titers and multiple comparisons  
426 were computed with Tukey's method. Area under the curve (AUC) was calculated for

427 longitudinally collected tracheal swabs from days 1,2 and 3 and log<sub>10</sub>-transformed. ANOVA of  
428 grouped log<sub>10</sub>-AUC was performed with multiple comparisons computed with Tukey's method.  
429 ANOVA was performed on untransformed histologic scores or percentage of lung affected by  
430 inflammation and multiple comparisons were computed with Bonferroni's method. A Kruskal-  
431 Wallis H test was performed on untransformed PRNT80 neutralization values and multiple  
432 comparisons were computed according to Dunn's method.

433

#### 434 **DATA AVAILABILITY**

435 All data contributing to the generation of figures and analyses described herein are available  
436 upon request from the corresponding author.

437

#### 438 **COMPETING INTERESTS**

439 TH and SSKL declare a conflict of interest as employees with minority ownership stakes of  
440 Immunophotonics, Inc., the manufacturer of the proprietary immune stimulant GC. RML  
441 declares a conflict of interest as an advisor with minority ownership stake in Immunophotonics.

442

#### 443 **AUTHOR CONTRIBUTIONS**

444 Conceptualization: RML, LLC, TH, SSKL, CMW, HL, and EEB. Investigation: CMW, HL, and  
445 EEB. Writing draft: CMW. Review and editing: CMW, HL, EEB, LLC, TH, SSKL, MKK, and RML.  
446 Visualization: CMW, EEB, MKK, LLC. Supervision and project administration: LLC. Funding  
447 acquisition: RML and LLC.

448

#### 449 **ACKNOWLEDGEMENTS**

450 Funding support was provided by the UC Berkeley Henry Wheeler Center for Emerging and  
451 Neglected Diseases (CEND) COVID Catalyst Fund, and internal funding from the UC Davis

452 Office of the Vice Chancellor of Research. Funding sources did not influence experimental  
453 design and analysis/interpretation of results or impact the decision to publish.

454

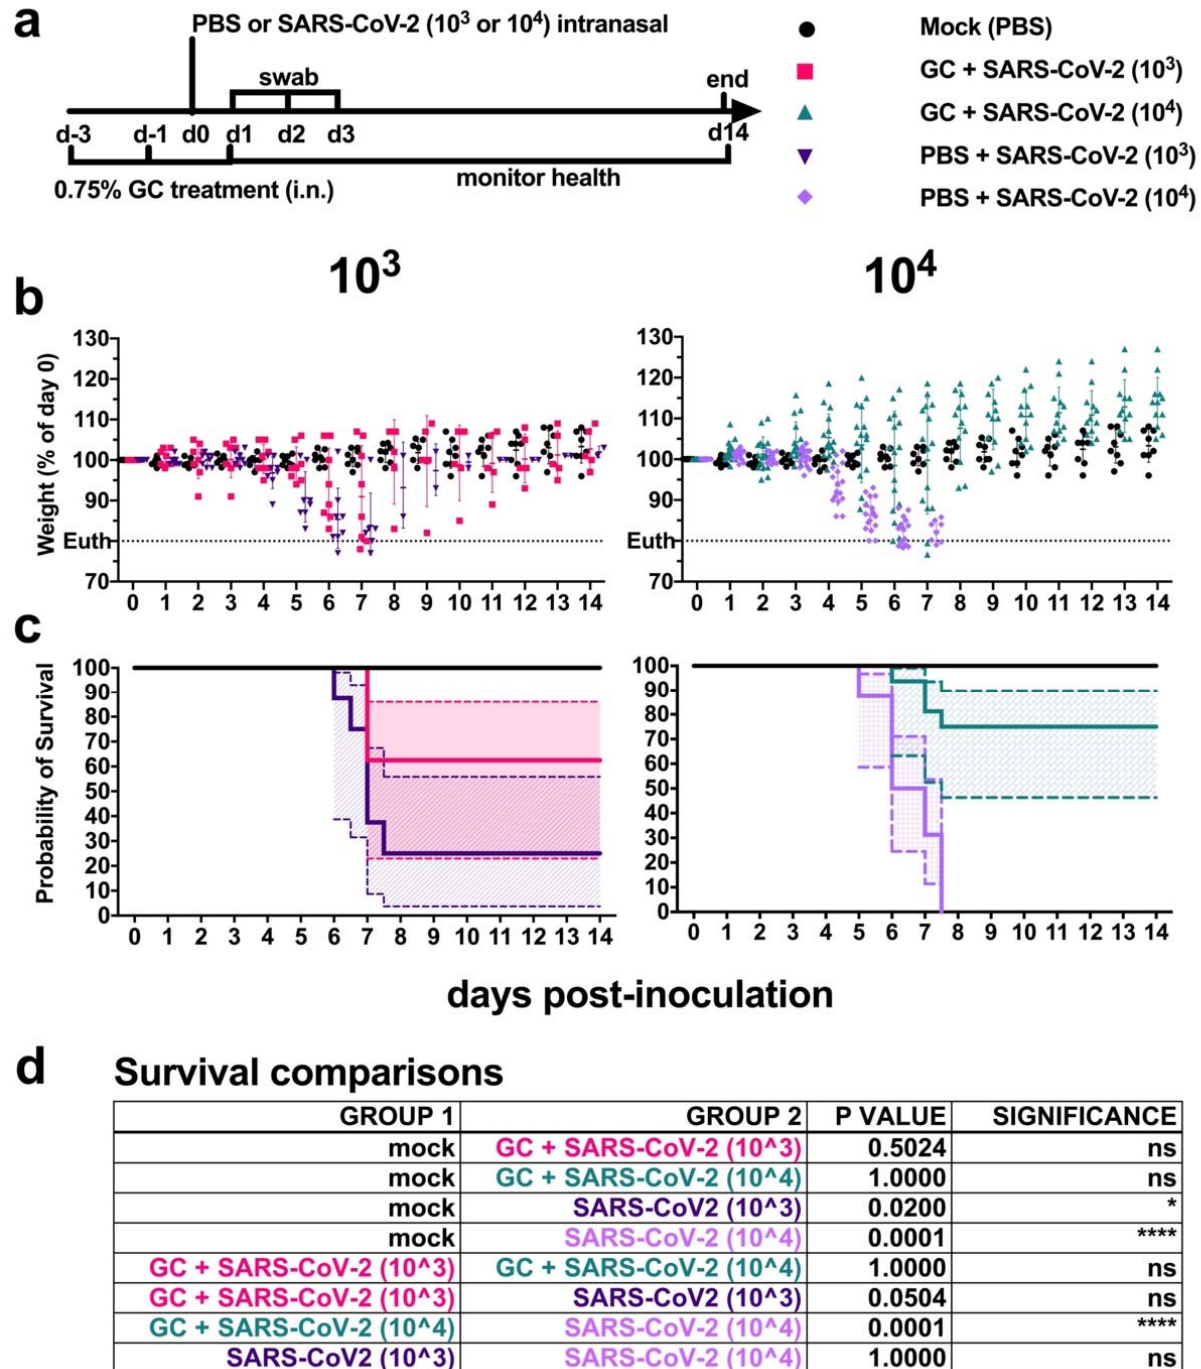

455 **Fig. 1: N-dihydrogalactochitosan protects mice from SARS-CoV-2 mortality. (a)**  
 456 **Experimental design** where 6-week-old male and female hACE2 transgenic mice were treated  
 457 with 0.75% GC or PBS delivery vehicle at days -3, -1 and +1 post-inoculation. Mice were  
 458 challenged at day 0 with  $10^3$  or  $10^4$  PFU of SARS-CoV-2 or PBS (mock). Animals were weighed

459 daily, and throats were swabbed on days 1 through 3. **(b) Weight** represented as a percentage  
460 of individual mouse weight at the time of challenge. Euth = euthanasia cutoff. A main effect only  
461 model two-way ANOVA with Tukey corrected multiple comparisons yielded an  $F=52.80$ ,  
462  $p<0.0001$ , 4 degrees of freedom. Each symbol represents an individual mouse, and the  
463 horizontal lines show geometric mean and error bars are geometric standard deviation. **(c)**  
464 **Survival proportions.** The solid lines are survival proportions, and the shaded boxes show  
465 95% confidence intervals. **(d) Logrank Mantel-Cox comparisons of survival proportions**  
466 with Bonferroni corrected p-values, multiple pairwise tests, 1 degree of freedom. n=8-16 per  
467 group, 2 combined experiments.

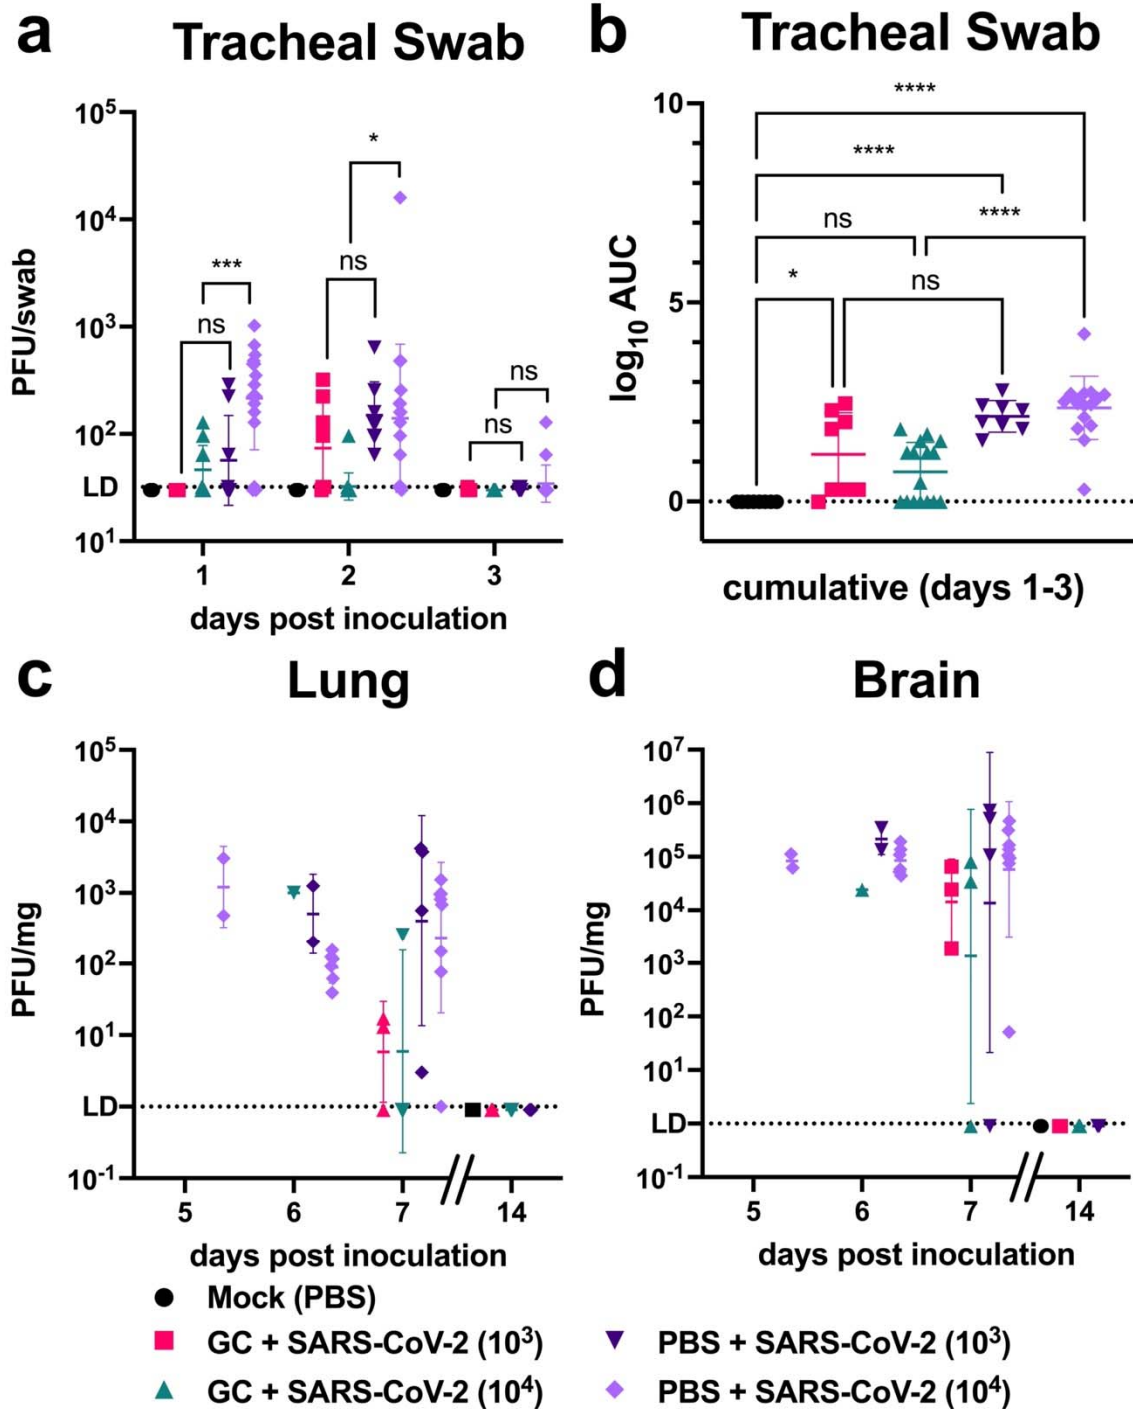

468

469

470

471

472

**Fig. 2: N-dihydrogalactochitosan reduces SARS-CoV-2 detection in the upper respiratory tract.** Infectious SARS-CoV-2 was measured in (a) tracheal swabs collected from hACE2 transgenic mice on days 1, 2 and 3 post inoculation. Repeated measures two-way ANOVA with Tukey corrected multiple comparisons on log<sub>10</sub>-transformed values,  $F=16.96$ ,  $p<0.0001$ , 4

473 degrees of freedom. **(b) Total area under the curve** shows cumulative virus levels in swabs.  
474 ANOVA of log<sub>10</sub>-transformed total peak area with Tukey corrected multiple comparisons,  
475  $F=7.538$ ,  $p<0.0001$ , 4 degrees of freedom. Mice were necropsied on days 5, 6, 7 and 14 post-  
476 inoculation as euthanasia criteria were met. Infectious virus levels were measured in **(c) lung**  
477 and **(d) brain** at experimental endpoints. Main effects only model two-way ANOVA on log<sub>10</sub>-  
478 transformed values,  $F=2.431$ ,  $p=0.0606$ , 4 degrees of freedom for lung,  $F=0.8134$ ,  $p=0.5229$ , 4  
479 degrees of freedom for brain. Symbols are individual animals, horizontal lines show geometric  
480 mean, and error bars represent geometric standard deviation. n=8-16 per group, 2 combined  
481 experiments. LD = limit of detection, AUC = area under the curve. \*  $p < 0.05$ , \*\*\*  $p < 0.001$ , \*\*\*\*  
482  $p < 0.0001$ .

483

484

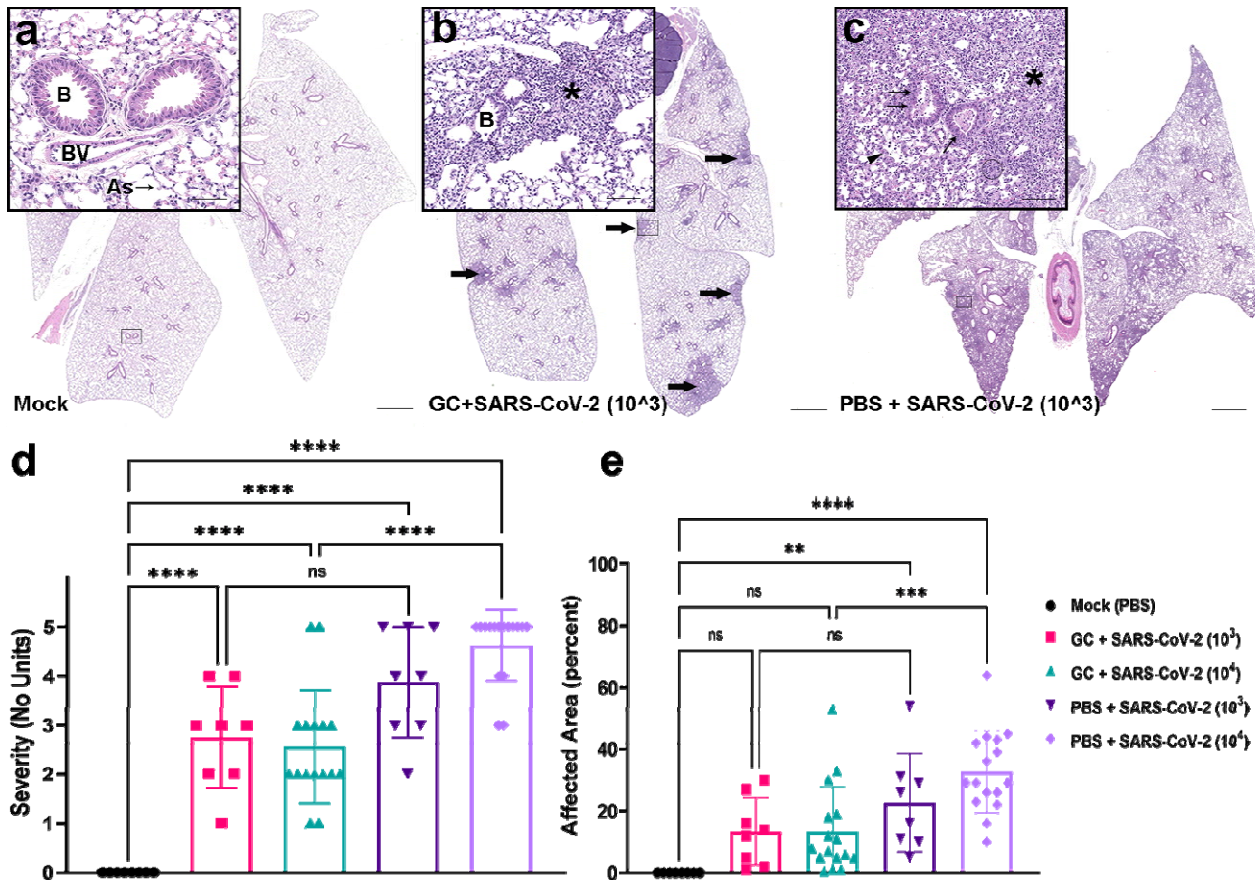

485

486

**Fig. 3: N-dihydrogalactochitosan reduces histopathology associated with SARS-CoV-2**

487

**infection in lungs.** Lungs from hACE2 transgenic mice were collected at the time of death, thin

488

sectioned, and hematoxylin and eosin stained for histopathological scoring. Images show

489

representative lungs. **(a) PBS-treated, mock inoculated mouse at day 14**, with normal

490

bronchioles lined by epithelial cells, alveolar septa containing pulmonary capillaries lined by

491

pneumocytes, and a small arteriole are visible in normal lung (inset). **(b) GC + 10<sup>3</sup> PFU SARS-**

492

**CoV-2 mouse at day 7** with patchy inflammation (black arrows) distributed around airways and

493

affecting approximately 15% of the section and peribronchiolar alveolar septal inflammation

494

composed primarily of lymphocytes and macrophages with scattered multinucleated cells

495

(inset). **(c) PBS + 10<sup>3</sup> PFU SARS-CoV-2 inoculated mouse at day 7** showing widespread,

496

multifocal to coalescing inflammation affecting all lung lobes and approximately 60% of the

497

section. Endotheliitis (circled) and bronchiolar epithelial hyperplasia characterized by



498 disorganization and piling-up of bronchiolar epithelium with increased mitotic figures (black  
499 arrows) is shown in inset. **(d) Lung lesion severity** was scored according to criteria defined in  
500 Supplementary Table 1 and the **(e) Total affected lung area** was estimated using image  
501 analysis software. Scale bars are 2 mm (subgross) and 50  $\mu\text{m}$  (insets). As=alveolar septa,  
502 B=bronchioles, Br=bronchus, BV=blood vessel. \*\*  $p < 0.01$ , \*\*\*  $p < 0.001$ , \*\*\*\*  $p < 0.0001$ ,  
503 ns=not significant. ANOVA,  $F=35.86$ ,  $p < 0.0001$ , 4 degrees of freedom (d). ANOVA,  $F=10.32$ ,  
504  $p < 0.0001$ , 4 degrees of freedom (e). Symbols are individual animals, bars show the mean, and  
505 error bars show the standard deviation, n=8-16 per group, 2 combined experiments.

506  
507  
508

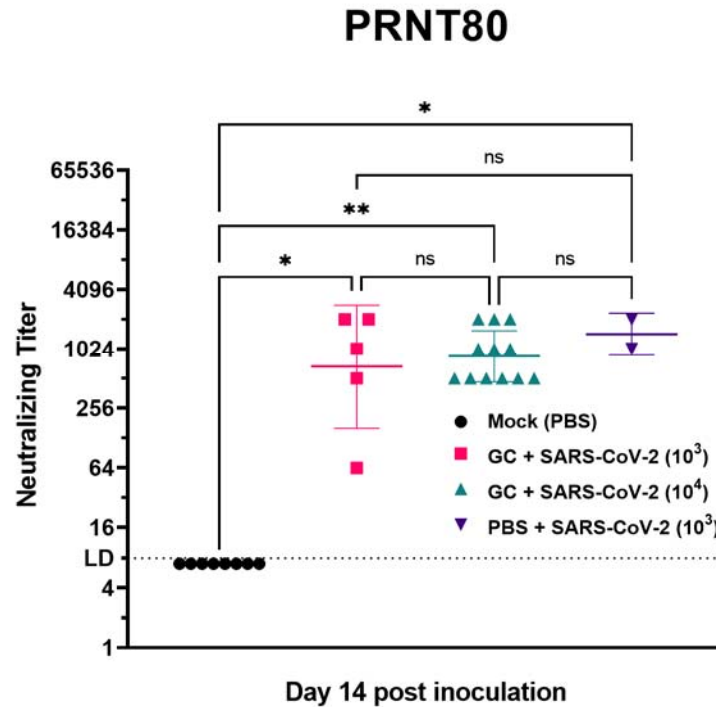

509

510

**Fig. 4: N-dihydrogalactochitosan treated mice surviving SARS-CoV-2 challenge produce**

511

**neutralizing antibodies.** Neutralizing antibody was assessed by 80% plaque reduction

512

neutralization test (PRNT80) in serum from hACE2 transgenic mice surviving to day 14 post

513

inoculation. No PBS treated mice inoculated with  $10^4$  PFU SARS-CoV-2 were available for

514

comparison due to uniform mortality. \*  $p < 0.05$ , \*\*  $p < 0.01$ , LD = limit of detection. Kruskal-

515

Wallis test with Dunn corrected multiple comparisons,  $H=17.87$ ,  $p=0.0005$ , 3 degrees of

516

freedom. Symbols are individual animals, horizontal lines are geometric mean and error bars

517

show geometric standard deviation,  $n=2-12$  per group, two combined experiments.

518

519

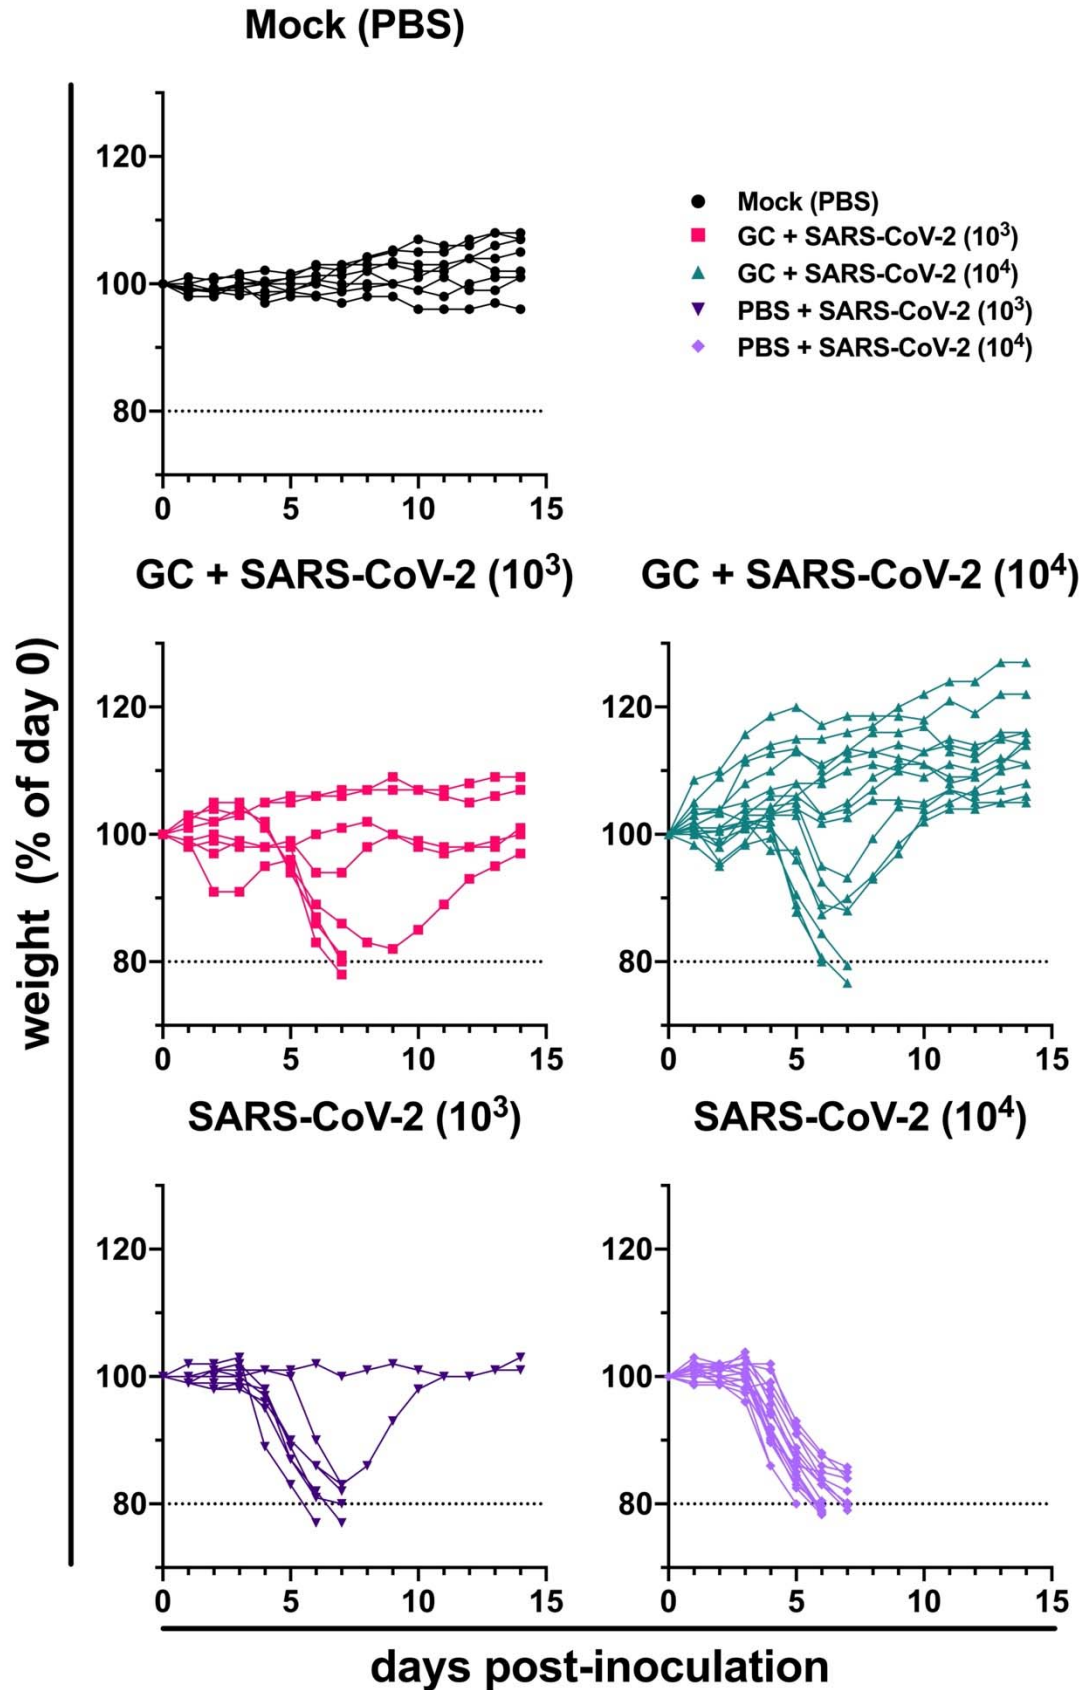

521 **Supplementary Fig. 1: N-dihydrogalactochitosan protects mice from SARS-CoV-2 weight**

522 **loss.** Each line shows individual mouse weight as a percentage of their starting weight at the

523 time of challenge.

524

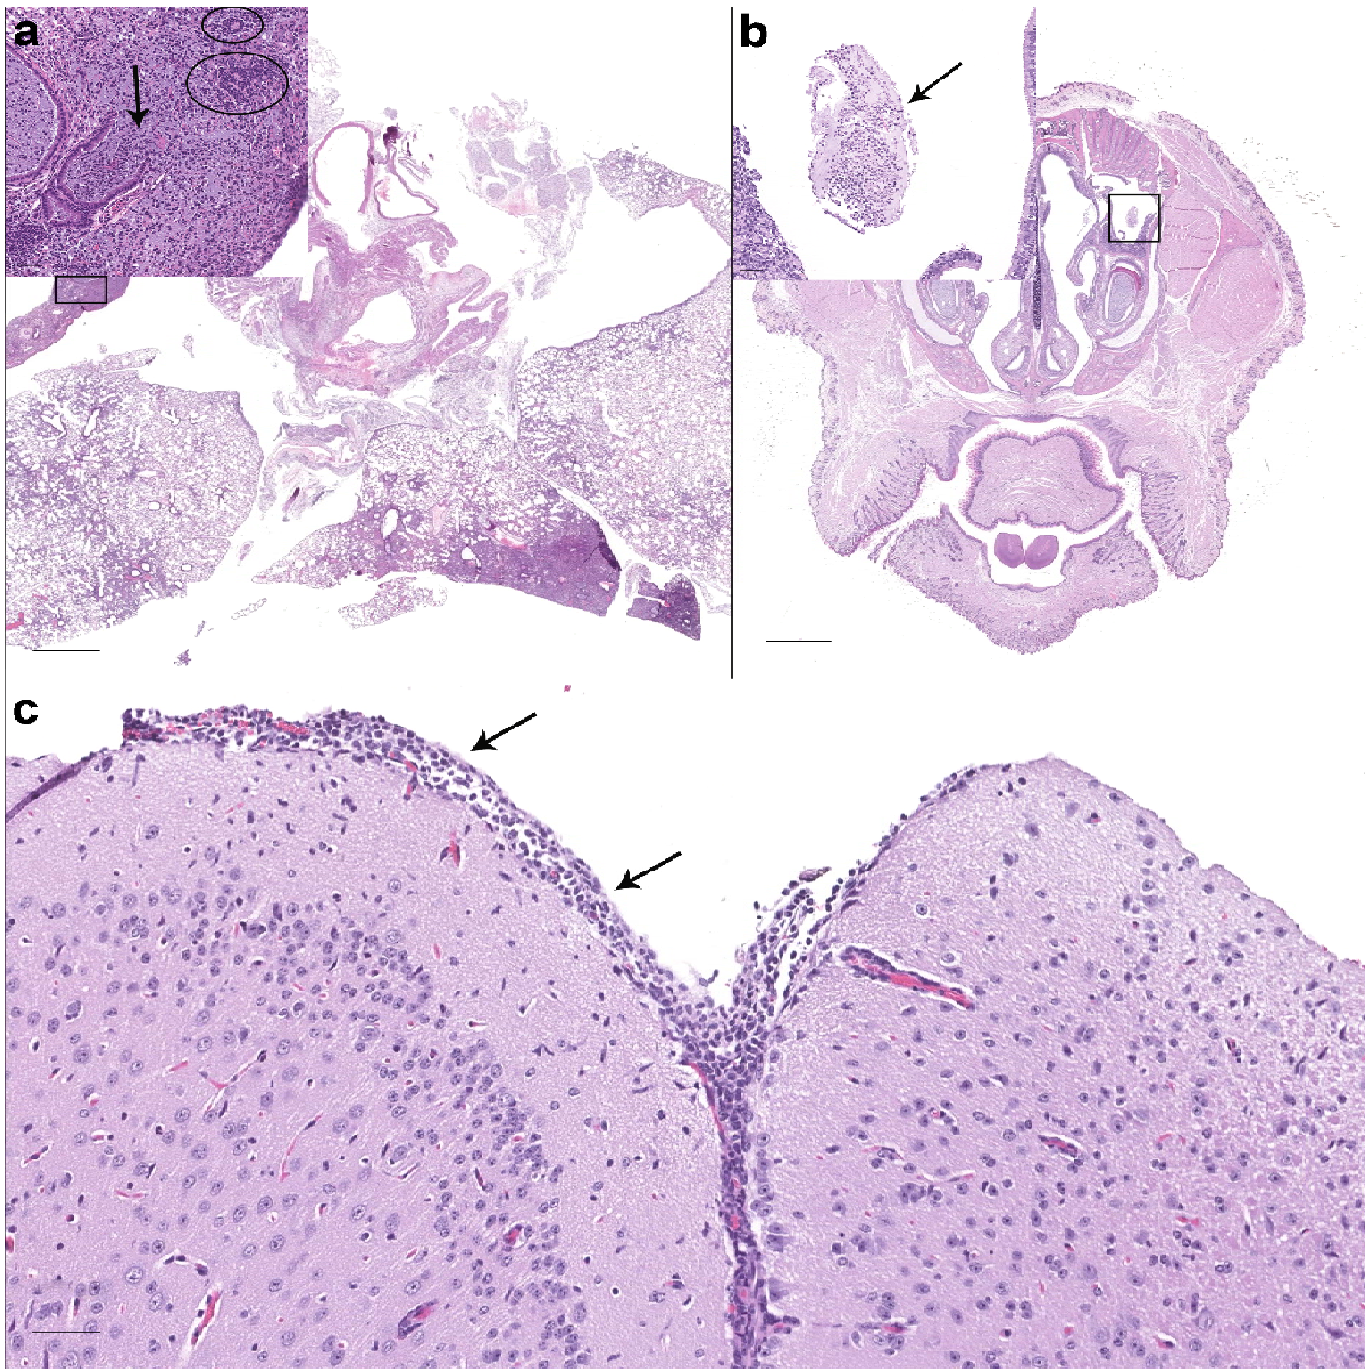

525 **Supplementary Fig. 2:** Additional photomicrographs of H&E-stained sections of lung, nasal  
526 cavity, and brain of hACE2 mice. **(a) Foreign material in lungs of some intranasally-treated**  
527 **animals.** Lung from a GC-treated  $10^4$  PFU SARS-CoV-2 inoculated male mouse at 7 days  
528 exhibits evidence of a foreign material reaction. Bronchioles are expanded by mucoid material,  
529 degenerate neutrophils and necrotic debris, with focal rupture of the bronchiolar wall (arrow),

530 extension of the inflammatory cells into adjacent alveoli, and foci of brightly eosinophilic foreign  
531 material surrounded by neutrophils and macrophages (circled) (inset). **(b-c) A subset of GC- or**  
532 **PBS-treated SARS-CoV-2 inoculated mice exhibit rhinitis and/or meningeal inflammation.**  
533 **(b)** Nasal cavity from a GC-treated  $10^4$  PFU SARS-CoV-2 inoculated female mouse at 6 days  
534 showing a focal exudate (box) composed of degenerate neutrophils and necrotic debris  
535 embedded in mucus (inset). **(c)** Brain from a GC-treated  $10^3$  PFU SARS-CoV-2 inoculated  
536 female mouse at 7 days with mild to moderate meningeal inflammation (arrows) composed  
537 primarily of lymphocytes with fewer macrophages. Scale bars are 1 mm (subgross) and 50  $\mu$ m  
538 (insets). H&E stain.

539

540

541

542

543

544

545

546

547

548

549

550

551

552

553

554

555

556

**Supplementary Table 1: Histopathology scoring criteria.**

| Score |          | Description                                                                                                                                                                                                                                                                                                                                                                                                                                                                                   |
|-------|----------|-----------------------------------------------------------------------------------------------------------------------------------------------------------------------------------------------------------------------------------------------------------------------------------------------------------------------------------------------------------------------------------------------------------------------------------------------------------------------------------------------|
| 0     | none     | Within normal limits or rare, scattered lymphocytic infiltrates not observed in control animals but significance questionable (could be background lesion or variation of normal).                                                                                                                                                                                                                                                                                                            |
| 1     | minimal  | Minimal mononuclear inflammation affecting less than 2% of the section. Inflammatory leukocyte infiltration is limited to a perivascular and/or peribronchiolar distribution with no evidence of alveolar or vascular injury.                                                                                                                                                                                                                                                                 |
| 2     | mild     | Mild peribronchiolar/perivascular inflammation which may also expand alveoli/alveolar septa, composed primarily of macrophages and lymphocytes (+/- scattered neutrophils); increased alveolar macrophages; alveolar septal architecture largely intact; affects 2-10% of the section; and/or scattered alveolar hemorrhage/fibrin/edema; and/or scattered atypical/multinucleated syncytial cells.                                                                                           |
| 3     | moderate | Moderate bronchointerstitial and perivascular inflammation, increased alveolar macrophages, and/or alveolar hemorrhage/fibrin/edema (characterized as above); and/or alveolar damage (characterized by type I pneumocyte necrosis or loss with replacement by hyaline membranes, fibrin, edema, and/or necrotic debris); and/or reparative/regenerative changes (type II pneumocyte hyperplasia, atypical/multinucleated syncytial cells, or fibrosis); lesions affect 10-25% of the section. |
| 4     | severe   | As above but more widespread inflammation, hemorrhage/fibrin/ edema, and/or alveolar damage/loss of normal septal architecture; and or regenerative changes affecting greater than 25% of the section.                                                                                                                                                                                                                                                                                        |
| +1    |          | Add 1 point if: Greater than 25% of inflammatory cells are neutrophils; there is significant necrotizing vasculitis, endotheliitis or microthrombi; or if there is significant bronchiolitis, airway epithelial necrosis or hyperplasia.                                                                                                                                                                                                                                                      |

557

558

559

560

561

562

563

564

565 **REFERENCES**

- 566
- 567 1. C. Huang, Y. Wang, X. Li, L. Ren, J. Zhao, Y. Hu, L. Zhang, G. Fan, J. Xu, X. Gu, Z. Cheng,
- 568 T. Yu, J. Xia, Y. Wei, W. Wu, X. Xie, W. Yin, H. Li, M. Liu, Y. Xiao, H. Gao, L. Guo, J. Xie, G.
- 569 Wang, R. Jiang, Z. Gao, Q. Jin, J. Wang, B. Cao, Clinical features of patients infected with 2019
- 570 novel coronavirus in Wuhan, China, *Lancet* (2020), doi:10.1016/S0140-6736(20)30183-5.
- 571 2. D. Wang, B. Hu, C. Hu, F. Zhu, X. Liu, J. Zhang, B. Wang, H. Xiang, Z. Cheng, Y. Xiong, Y.
- 572 Zhao, Y. Li, X. Wang, Z. Peng, Clinical Characteristics of 138 Hospitalized Patients with 2019
- 573 Novel Coronavirus-Infected Pneumonia in Wuhan, China, *JAMA - J. Am. Med. Assoc.* **323**,
- 574 1061–1069 (2020).
- 575 3. N. Chen, M. Zhou, X. Dong, J. Qu, F. Gong, Y. Han, Y. Qiu, J. Wang, Y. Liu, Y. Wei, J. Xia,
- 576 T. Yu, X. Zhang, L. Zhang, Epidemiological and clinical characteristics of 99 cases of 2019
- 577 novel coronavirus pneumonia in Wuhan, China: a descriptive study, *Lancet* **395**, 507–513
- 578 (2020).
- 579 4. F. Zhou, T. Yu, R. Du, G. Fan, Y. Liu, Z. Liu, J. Xiang, Y. Wang, B. Song, X. Gu, L. Guan, Y.
- 580 Wei, H. Li, X. Wu, J. Xu, S. Tu, Y. Zhang, H. Chen, B. Cao, Clinical course and risk factors for
- 581 mortality of adult inpatients with COVID-19 in Wuhan, China: a retrospective cohort study,
- 582 *Lancet* **395**, 1054–1062 (2020).
- 583 5. J. Hellmuth, T. A. Barnett, B. M. Asken, J. D. Kelly, L. Torres, M. L. Stephens, B.
- 584 Greenhouse, J. N. Martin, F. C. Chow, S. G. Deeks, M. Greene, B. L. Miller, W. Annan, T. J.
- 585 Henrich, M. J. Peluso, Persistent COVID-19-associated neurocognitive symptoms in non-
- 586 hospitalized patients, *J. Neurovirol.* **27**, 191–195 (2021).
- 587 6. E. L. Graham, J. R. Clark, Z. S. Orban, P. H. Lim, A. L. Szymanski, C. Taylor, R. M. DiBiase,
- 588 D. T. Jia, R. Balabanov, S. U. Ho, A. Batra, E. M. Liotta, I. J. Koralnik, Persistent neurologic
- 589 symptoms and cognitive dysfunction in non-hospitalized Covid-19 “long haulers,” *Ann. Clin.*
- 590 *Transl. Neurol.* (2021), doi:10.1002/acn3.51350.
- 591 7. R. Lu, X. Zhao, J. Li, P. Niu, B. Yang, H. Wu, W. Wang, H. Song, B. Huang, N. Zhu, Y. Bi, X.



- 592 Ma, F. Zhan, L. Wang, T. Hu, H. Zhou, Z. Hu, W. Zhou, L. Zhao, J. Chen, Y. Meng, J. Wang, Y.  
593 Lin, J. Yuan, Z. Xie, J. Ma, W. J. Liu, D. Wang, W. Xu, E. C. Holmes, G. F. Gao, G. Wu, W.  
594 Chen, W. Shi, W. Tan, Genomic characterisation and epidemiology of 2019 novel coronavirus:  
595 implications for virus origins and receptor binding, *Lancet* **395**, 565–574 (2020).
- 596 8. P. Zhou, X. Lou Yang, X. G. Wang, B. Hu, L. Zhang, W. Zhang, H. R. Si, Y. Zhu, B. Li, C. L.  
597 Huang, H. D. Chen, J. Chen, Y. Luo, H. Guo, R. Di Jiang, M. Q. Liu, Y. Chen, X. R. Shen, X.  
598 Wang, X. S. Zheng, K. Zhao, Q. J. Chen, F. Deng, L. L. Liu, B. Yan, F. X. Zhan, Y. Y. Wang, G.  
599 F. Xiao, Z. L. Shi, A pneumonia outbreak associated with a new coronavirus of probable bat  
600 origin, *Nature* **579**, 270–273 (2020).
- 601 9. S. S. Lakdawala, V. D. Menachery, The search for a COVID-19 animal model, *Science* (80-  
602 ). **368**, 942–943 (2020).
- 603 10. C. Muñoz-Fontela, W. E. Dowling, S. G. P. Funnell, P. S. Gsell, A. X. Riveros-Balta, R. A.  
604 Albrecht, H. Andersen, R. S. Baric, M. W. Carroll, M. Cavaleri, C. Qin, I. Crozier, K. Dallmeier, L.  
605 de Waal, E. de Wit, L. Delang, E. Dohm, W. P. Duprex, D. Falzarano, C. L. Finch, M. B.  
606 Frieman, B. S. Graham, L. E. Gralinski, K. Guilfoyle, B. L. Haagmans, G. A. Hamilton, A. L.  
607 Hartman, S. Herfst, S. J. F. Kaptein, W. B. Klimstra, I. Knezevic, P. R. Krause, J. H. Kuhn, R. Le  
608 Grand, M. G. Lewis, W. C. Liu, P. Maisonnasse, A. K. McElroy, V. Munster, N. Oreshkova, A. L.  
609 Rasmussen, J. Rocha-Pereira, B. Rockx, E. Rodríguez, T. F. Rogers, F. J. Salguero, M.  
610 Schotsaert, K. J. Stittelaar, H. J. Thibaut, C. Te Tseng, J. Vergara-Alert, M. Beer, T. Brasel, J. F.  
611 W. Chan, A. García-Sastre, J. Neyts, S. Perlman, D. S. Reed, J. A. Richt, C. J. Roy, J. Segalés,  
612 S. S. Vasan, A. M. Henao-Restrepo, D. H. Barouch, Animal models for COVID-19, *Nature* **586**,  
613 509–515 (2020).
- 614 11. P. B. McCray, L. Pewe, C. Wohlford-Lenane, M. Hickey, L. Manzel, L. Shi, J. Netland, H. P.  
615 Jia, C. Halabi, C. D. Sigmund, D. K. Meyerholz, P. Kirby, D. C. Look, S. Perlman, Lethal  
616 Infection of K18-hACE2 Mice Infected with Severe Acute Respiratory Syndrome Coronavirus, *J.*  
617 *Virology*. (2007), doi:10.1128/jvi.02012-06.

- 618 12. E. S. Winkler, A. L. Bailey, N. M. Kafai, S. Nair, B. T. McCune, J. Yu, J. M. Fox, R. E. Chen,  
619 J. T. Earnest, S. P. Keeler, J. H. Ritter, L. I. Kang, S. Dort, A. Robichaud, R. Head, M. J.  
620 Holtzman, M. S. Diamond, SARS-CoV-2 infection of human ACE2-transgenic mice causes  
621 severe lung inflammation and impaired function, *Nat. Immunol.* **21**, 1327–1335 (2020).
- 622 13. J. Zheng, L. Y. R. Wong, K. Li, A. K. Verma, M. E. Ortiz, C. Wohlford-Lenane, M. R.  
623 Leidinger, C. M. Knudson, D. K. Meyerholz, P. B. McCray, S. Perlman, COVID-19 treatments  
624 and pathogenesis including anosmia in K18-hACE2 mice, *Nature* **589**, 603–607 (2021).
- 625 14. Symptoms of COVID-19 | CDC (available at [https://www.cdc.gov/coronavirus/2019-](https://www.cdc.gov/coronavirus/2019-ncov/symptoms-testing/symptoms.html)  
626 [ncov/symptoms-testing/symptoms.html](https://www.cdc.gov/coronavirus/2019-ncov/symptoms-testing/symptoms.html)).
- 627 15. FDA Issues Emergency Use Authorization for Third COVID-19 Vaccine | FDA (available at  
628 [https://www.fda.gov/news-events/press-announcements/fda-issues-emergency-use-](https://www.fda.gov/news-events/press-announcements/fda-issues-emergency-use-authorization-third-covid-19-vaccine)  
629 [authorization-third-covid-19-vaccine](https://www.fda.gov/news-events/press-announcements/fda-issues-emergency-use-authorization-third-covid-19-vaccine)).
- 630 16. Coronavirus disease (COVID-19): Herd immunity, lockdowns and COVID-19 (available at  
631 <https://www.who.int/news-room/q-a-detail/herd-immunity-lockdowns-and-covid-19>).
- 632 17. A. Rhoades, *Veklury (remdesivir) EUA Letter of Approval, reissued 10/22/2020* (2020).
- 633 18. J. H. Beigel, K. M. Tomashek, L. E. Dodd, A. K. Mehta, B. S. Zingman, A. C. Kalil, E.  
634 Hohmann, H. Y. Chu, A. Luetkemeyer, S. Kline, D. Lopez de Castilla, R. W. Finberg, K.  
635 Dierberg, V. Tapson, L. Hsieh, T. F. Patterson, R. Paredes, D. A. Sweeney, W. R. Short, G.  
636 Touloumi, D. C. Lye, N. Ohmagari, M. Oh, G. M. Ruiz-Palacios, T. Benfield, G. Fätkenheuer, M.  
637 G. Kortepeter, R. L. Atmar, C. B. Creech, J. Lundgren, A. G. Babiker, S. Pett, J. D. Neaton, T.  
638 H. Burgess, T. Bonnett, M. Green, M. Makowski, A. Osinusi, S. Nayak, H. C. Lane, Remdesivir  
639 for the Treatment of Covid-19 — Final Report, *N. Engl. J. Med.* **383**, 1813–1826 (2020).
- 640 19. WHO recommends against the use of remdesivir in COVID-19 patients (available at  
641 [https://www.who.int/news-room/feature-stories/detail/who-recommends-against-the-use-of-](https://www.who.int/news-room/feature-stories/detail/who-recommends-against-the-use-of-remdesivir-in-covid-19-patients)  
642 [remdesivir-in-covid-19-patients](https://www.who.int/news-room/feature-stories/detail/who-recommends-against-the-use-of-remdesivir-in-covid-19-patients)).
- 643 20. Food and Drug Administration, *FDA Combating COVID-19 With Therapeutics* (2020)

- 644 (available at <https://www.fda.gov/media/136832/download>).
- 645 21. S. N. Chirkov, The antiviral activity of chitosan (review)*Appl. Biochem. Microbiol.* **38**, 1–8  
646 (2002).
- 647 22. M. Mehrabi, H. Montazeri, M. N. Dounighi, A. Rashti, R. Vakili-Ghartavol, Chitosan-based  
648 nanoparticles in mucosal vaccine delivery*Arch. Razi Inst.* **73**, 165–176 (2018).
- 649 23. X. Li, M. Min, N. Du, Y. Gu, T. Hode, M. Naylor, D. Chen, R. E. Nordquist, W. R. Chen,  
650 Chitin, chitosan, and glycated chitosan regulate immune responses: The novel adjuvants for  
651 cancer vaccine*Clin. Dev. Immunol.* **2013** (2013), doi:10.1155/2013/387023.
- 652 24. J. Mudgal, P. P. Mudgal, M. Kinra, R. Raval, Immunomodulatory role of chitosan-based  
653 nanoparticles and oligosaccharides in cyclophosphamide-treated mice, *Scand. J. Immunol.* **89**,  
654 e12749 (2019).
- 655 25. T. D. Carroll, S. Jegaskanda, S. R. Matzinger, L. Fritts, M. B. McChesney, S. J. Kent, J.  
656 Fairman, C. J. Miller, A lipid/DNA adjuvant-inactivated influenza virus vaccine protects rhesus  
657 macaques from uncontrolled virus replication after heterosubtypic influenza A virus challenge, *J.*  
658 *Infect. Dis.* (2018), doi:10.1093/infdis/jiy238.
- 659 26. X. Lei, X. Dong, R. Ma, W. Wang, X. Xiao, Z. Tian, C. Wang, Y. Wang, L. Li, L. Ren, F. Guo,  
660 Z. Zhao, Z. Zhou, Z. Xiang, J. Wang, Activation and evasion of type I interferon responses by  
661 SARS-CoV-2, *Nat. Commun.* **11** (2020), doi:10.1038/s41467-020-17665-9.
- 662 27. H. Xia, Z. Cao, X. Xie, X. Zhang, J. Y. C. Chen, H. Wang, V. D. Menachery, R. Rajsbaum,  
663 P. Y. Shi, Evasion of Type I Interferon by SARS-CoV-2, *Cell Rep.* **33** (2020),  
664 doi:10.1016/j.celrep.2020.108234.
- 665 28. M. S. Ribero, N. Jouvenet, M. Dreux, S. Nisole, Interplay between SARS-CoV-2 and the  
666 type I interferon response*PLoS Pathog.* **16** (2020), doi:10.1371/journal.ppat.1008737.
- 667 29. M. Zheng, D. Qu, H. Wang, Z. Sun, X. Liu, J. Chen, C. Li, X. Li, Z. Chen, Intranasal  
668 Administration of Chitosan Against Influenza A (H7N9) Virus Infection in a Mouse Model, *Sci.*  
669 *Rep.* **6** (2016), doi:10.1038/srep28729.

- 670 30. X. Wang, W. Zhang, F. Liu, M. Zheng, D. Zheng, T. Zhang, Y. Yi, Y. Ding, J. Luo, C. Dai, H.  
671 Wang, B. Sun, Z. Chen, Intranasal immunization with live attenuated influenza vaccine plus  
672 chitosan as an adjuvant protects mice against homologous and heterologous virus challenge,  
673 *Arch. Virol.* **157**, 1451–1461 (2012).
- 674 31. B. Choi, D. H. Jo, A. K. M. M. Anower, S. M. S. Islam, S. Sohn, Chitosan as an  
675 Immunomodulating Adjuvant on T-Cells and Antigen-Presenting Cells in Herpes Simplex Virus  
676 Type 1 Infection, *Mediators Inflamm.* **2016** (2016), doi:10.1155/2016/4374375.
- 677 32. W. R. Chen, R. Carubelli, H. Liu, R. E. Nordquist, Laser immunotherapy: A novel treatment  
678 modality for metastatic tumors, *Appl. Biochem. Biotechnol. - Part B Mol. Biotechnol.* **25**, 37–43  
679 (2003).
- 680 33. S. Song, F. Zhou, R. E. Nordquist, R. Carubelli, H. Liu, W. R. Chen, Glycated chitosan as a  
681 new non-toxic immunological stimulant Glycated chitosan immunological stimulant,  
682 *Immunopharmacol. Immunotoxicol.* **31**, 202–208 (2009).
- 683 34. I. Zizzari, C. Napoletano, F. Battisti, H. Rahimi, S. Caponnetto, L. Pierelli, M. Nuti, A.  
684 Rughetti, MGL Receptor and Immunity: When the Ligand Can Make the Difference, *J. Immunol.*  
685 *Res.* **2015** (2015), doi:10.1155/2015/450695.
- 686 35. M. Korbelik, J. Banáth, W. Zhang, T. Hode, S. Lam, P. Gallagher, J. Zhao, H. Zeng, W.  
687 Chen, N-dihydrogalactochitosan-supported tumor control by photothermal therapy and  
688 photothermal therapy-generated vaccine, *J. Photochem. Photobiol. B.* **204** (2020),  
689 doi:10.1016/J.JPHOTOBIOL.2020.111780.
- 690 36. M. Korbelik, T. Hode, S. S. K. Lam, W. R. Chen, Novel Immune Stimulant Amplifies Direct  
691 Tumoricidal Effect of Cancer Ablation Therapies and Their Systemic Antitumor Immune  
692 Efficacy *Cells* **10** (2021), doi:10.3390/cells10030492.
- 693 37. S. Qi, L. Lu, F. Zhou, Y. Chen, M. Xu, L. Chen, X. Yu, W. R. Chen, Z. Zhang, Neutrophil  
694 infiltration and whole-cell vaccine elicited by N-dihydrogalactochitosan combined with NIR  
695 phototherapy to enhance antitumor immune response and T cell immune memory, *Theranostics*

- 696 **10**, 1814–1832 (2020).
- 697 38. F. Zhou, J. Yang, Y. Zhang, M. Liu, M. L. Lang, M. Li, W. R. Chen, Local phototherapy  
698 synergizes with immunoadjuvant for treatment of pancreatic cancer through induced  
699 immunogenic tumor vaccine, *Clin. Cancer Res.* **24**, 5335–5346 (2018).
- 700 39. A. El-Hussein, S. S. K. Lam, J. Raker, W. R. Chen, M. R. Hamblin, N-  
701 dihydrogalactochitosan as a potent immune activator for dendritic cells, *J. Biomed. Mater. Res. -*  
702 *Part A* **105**, 963–972 (2017).
- 703 40. A. R. Hoover, K. Liu, C. I. Devette, J. R. Krawic, C. L. West, D. Medcalf, A. L. Welm, X.-H.  
704 Sun, W. H. Hildebrand, W. R. Chen, ScRNA-seq reveals tumor microenvironment remodeling  
705 induced by local intervention-based immunotherapy, *bioRxiv*, 2020.10.02.323006 (2020).
- 706 41. C. Brown, J. Vostok, H. Johnson, M. Burns, R. Gharpure, S. Sami, R. Sabo, N. Hall, A.  
707 Foreman, P. Schubert, G. Gallagher, T. Fink, L. Madoff, S. Gabriel, B. MacInnis, D. Park, K.  
708 Siddle, V. Harik, D. Arvidson, T. Brock-Fisher, M. Dunn, A. Kearns, A. Laney, Outbreak of  
709 SARS-CoV-2 Infections, Including COVID-19 Vaccine Breakthrough Infections, Associated with  
710 Large Public Gatherings - Barnstable County, Massachusetts, July 2021, *MMWR. Morb. Mortal.*  
711 *Wkly. Rep.* **70**, 1059–1062 (2021).
- 712 42. B. Bellich, I. D'Agostino, S. Semeraro, A. Gamini, A. Cesàro, “The Good, the Bad and the  
713 Ugly” of Chitosans, *Mar. Drugs* **14** (2016), doi:10.3390/MD14050099.
- 714 43. K. Jayathilakan, K. Sultana, K. Radhakrishna, A. S. Bawa, Utilization of byproducts and  
715 waste materials from meat, poultry and fish processing industries: A review *J. Food Sci. Technol.*  
716 **49**, 278–293 (2012).
- 717 44. N. A. Negm, H. H. H. Hefni, A. A. A. Abd-Elaal, E. A. Badr, M. T. H. Abou Kana,  
718 Advancement on modification of chitosan biopolymer and its potential applications *Int. J. Biol.*  
719 *Macromol.* **152**, 681–702 (2020).
- 720 45. H. Mokhtar, L. Biffar, S. Somavarapu, J. P. Frossard, S. McGowan, M. Pedrera, R. Strong,  
721 J. C. Edwards, M. Garcia-Durán, M. J. Rodriguez, G. R. Stewart, F. Steinbach, S. P. Graham,

- 722 Evaluation of hydrophobic chitosan-based particulate formulations of porcine reproductive and  
723 respiratory syndrome virus vaccine candidate T cell antigens, *Vet. Microbiol.* **209**, 66–74 (2017).
- 724 46. S. Shim, H. E. Park, S. H. Soh, Y. Bin Im, H. S. Yoo, Induction of Th2 response through  
725 TLR2-mediated MyD88-dependent pathway in human microfold cells stimulated with chitosan  
726 nanoparticles loaded with *Brucella abortus* Mdh, *Microb. Pathog.* **142** (2020),  
727 doi:10.1016/j.micpath.2020.104040.
- 728 47. X. Zhang, K. Wu, D. Wang, X. Yue, D. Song, Y. Zhu, J. Wu, Nucleocapsid protein of SARS-  
729 CoV activates interleukin-6 expression through cellular transcription factor NF- $\kappa$ B, *Virology* **365**,  
730 324–335 (2007).
- 731 48. D. Blanco-Melo, B. E. Nilsson-Payant, W. C. Liu, S. Uhl, D. Hoagland, R. Møller, T. X.  
732 Jordan, K. Oishi, M. Panis, D. Sachs, T. T. Wang, R. E. Schwartz, J. K. Lim, R. A. Albrecht, B.  
733 R. tenOever, Imbalanced Host Response to SARS-CoV-2 Drives Development of COVID-19,  
734 *Cell* **181**, 1036-1045.e9 (2020).
- 735 49. C. Pyle, F. Uwadiae, D. Swieboda, J. Harker, Early IL-6 signalling promotes IL-27  
736 dependent maturation of regulatory T cells in the lungs and resolution of viral immunopathology,  
737 *PLoS Pathog.* **13** (2017), doi:10.1371/JOURNAL.PPAT.1006640.
- 738 50. C. L. Bueter, C. K. Lee, V. A. K. Rathinam, G. J. Healy, C. H. Taron, C. A. Specht, S. M.  
739 Levitz, Chitosan but not chitin activates the inflammasome by a mechanism dependent upon  
740 phagocytosis, *J. Biol. Chem.* **286**, 35447–35455 (2011).
- 741 51. E. C. Carroll, L. Jin, A. Mori, N. Muñoz-Wolf, E. Oleszycka, H. B. T. Moran, S. Mansouri, C.  
742 P. McEntee, E. Lambe, E. M. Agger, P. Andersen, C. Cunningham, P. Hertzog, K. A. Fitzgerald,  
743 A. G. Bowie, E. C. Lavelle, The Vaccine Adjuvant Chitosan Promotes Cellular Immunity via DNA  
744 Sensor cGAS-STING-Dependent Induction of Type I Interferons, *Immunity* **44**, 597–608 (2016).
- 745 52. B. Sun, S. Yu, D. Zhao, S. Guo, X. Wang, K. Zhao, Polysaccharides as vaccine  
746 adjuvants *Vaccine* **36**, 5226–5234 (2018).
- 747 53. R. C. Read, S. C. Naylor, C. W. Potter, J. Bond, I. Jabbal-Gill, A. Fisher, L. Illum, R.

- 748 Jennings, Effective nasal influenza vaccine delivery using chitosan, *Vaccine* **23**, 4367–4374  
749 (2005).
- 750 54. D. Elieh Ali Komi, L. Sharma, C. S. Dela Cruz, Chitin and Its Effects on Inflammatory and  
751 Immune Responses *Clin. Rev. Allergy Immunol.* **54**, 213–223 (2018).
- 752 55. S. Bashiri, P. Koirala, I. Toth, M. Skwarczynski, Carbohydrate immune adjuvants in subunit  
753 vaccines *Pharmaceutics* **12**, 1–33 (2020).
- 754 56. C. L. Bueter, C. A. Specht, S. M. Levitz, Innate Sensing of Chitin and Chitosan, *PLoS*  
755 *Pathog.* **9** (2013), doi:10.1371/journal.ppat.1003080.
- 756 57. J. Seetharaman, A. Kfanigsberg, R. Slaaby, H. Leffler, S. H. Barondes, J. M. Rini, X-ray  
757 crystal structure of the human galectin-3 carbohydrate recognition domain at 2.1-Å resolution, *J.*  
758 *Biol. Chem.* **273**, 13047–13052 (1998).
- 759 58. T. Semeňuk, P. Krist, J. Pavlíček, K. Bezouška, M. Kuzma, P. Novák, V. Křen, Synthesis of  
760 chitooligomer-based glycoconjugates and their binding to the rat natural killer cell activation  
761 receptor NKR-P1, *Glycoconj. J.* **18**, 817–826 (2001).
- 762 59. F. Zhou, S. Wu, S. Song, W. R. Chen, D. E. Resasco, D. Xing, Antitumor immunologically  
763 modified carbon nanotubes for photothermal therapy, *Biomaterials* **33**, 3235–3242 (2012).
- 764 60. R. J. Nevagi, Z. G. Khalil, W. M. Hussein, J. Powell, M. R. Batzloff, R. J. Capon, M. F. Good,  
765 M. Skwarczynski, I. Toth, Polyglutamic acid-trimethyl chitosan-based intranasal peptide nano-  
766 vaccine induces potent immune responses against group A streptococcus, *Acta Biomater.* **80**,  
767 278–287 (2018).
- 768 61. F. Micoli, P. Costantino, R. Adamo, Potential targets for next generation antimicrobial  
769 glycoconjugate vaccines *FEMS Microbiol. Rev.* **42**, 388–423 (2018).

770
